# Supplementary material
Source: publisher site journal article supplement (https://www.dovepress.com/article/344842)
Supplement: Supplementary file 1 [file get_supplementary_file.php]

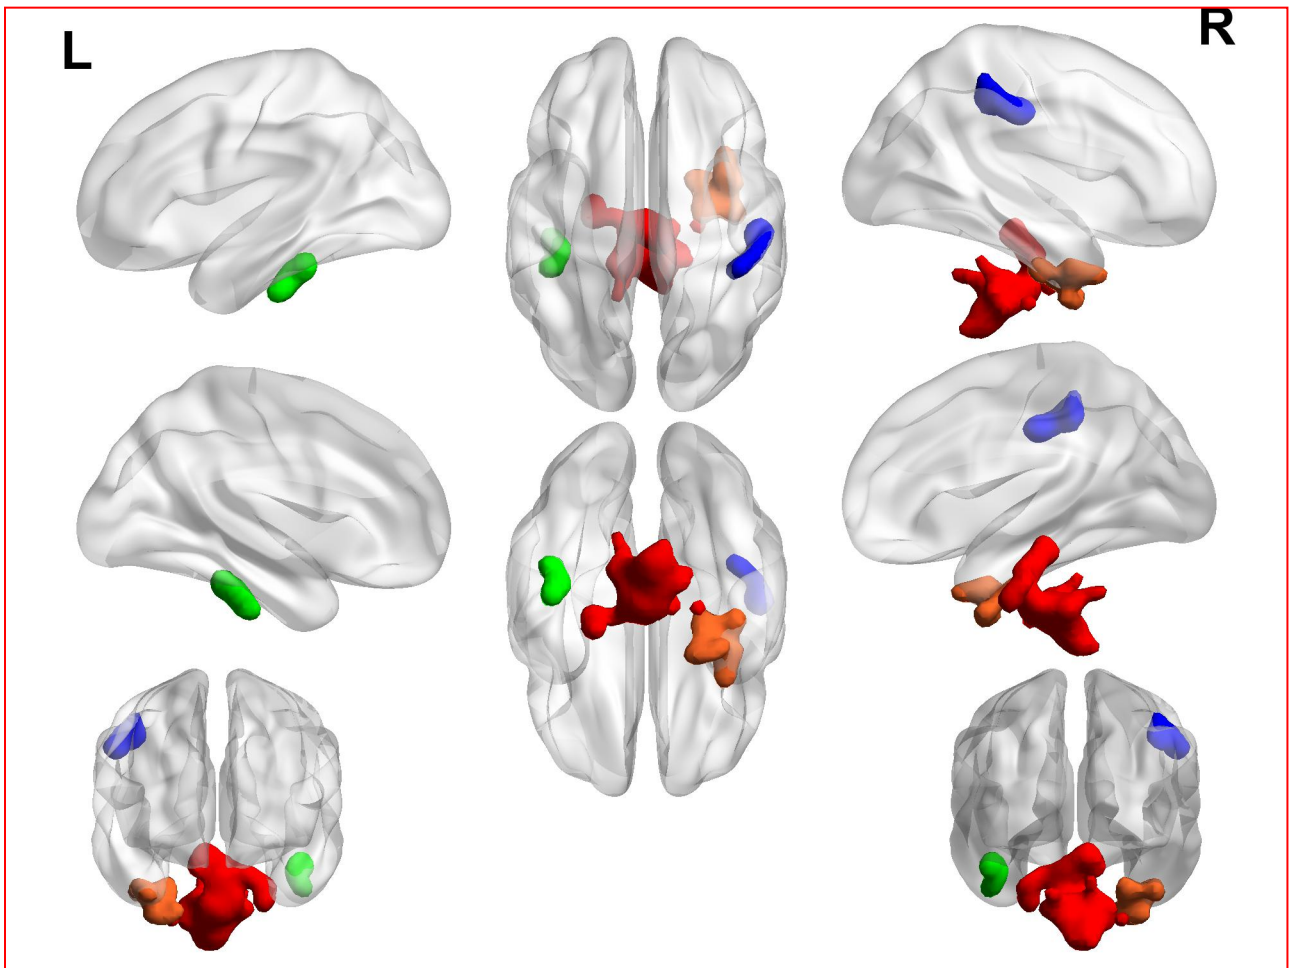

**Fig S1** This results were similar to Fig5A between 20 male pre-CAPA OSA patients and 20 HC groups in the typical frequency band (0.01-0.08 Hz), indicated that the stability of the results was independent of gender.
